# Supplementary material for: Bael (Aegle marmelos L. Corrêa), a Medicinal Tree with Immense Economic Potentials
Source: Hindawi journal article supplement (doi:10.1155/2020/8814018), 2020-12-09
Supplement: f1 [file 8814018.f1.pdf]

# Supplemental Information

## **Bael (*Aegle marmelos* L. Corrêa), A Medicinal Tree with Immense Economic Potentials: A Review**

Running Title: A review on *Aegle marmelos*

**Chamila Kumari Pathirana<sup>1,2\*</sup>, Terrence Madhujith<sup>2,3</sup>, and Janakie Eeswara<sup>1,2</sup>**

<sup>1</sup>Department of Crop Science, Faculty of Agriculture, University of Peradeniya, Peradeniya, Sri Lanka

<sup>2</sup>Postgraduate Institute of Agriculture, University of Peradeniya; Peradeniya, Sri Lanka

<sup>3</sup>Department of Food Science and Technology, Faculty of Agriculture, University of Peradeniya; Peradeniya,  
20400, Sri Lanka

\*Corresponding Author (CP): ckpathirana0421@gmail.com, ORCID 0000-0002-6560-8442

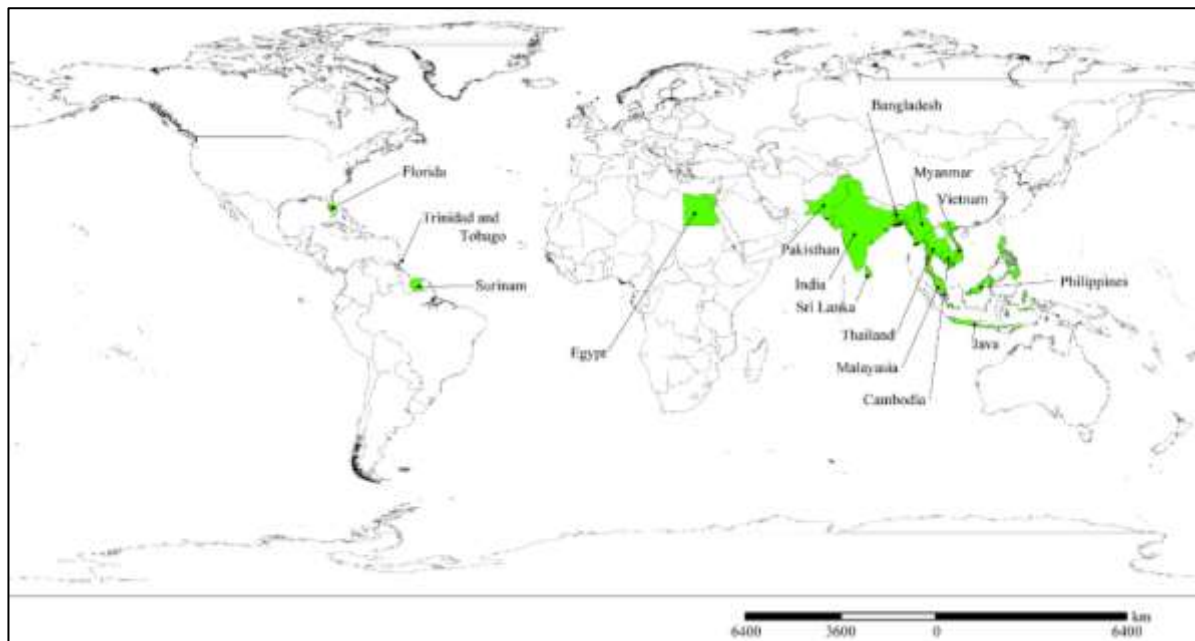

**S Figure 1.** The world distribution of bael.

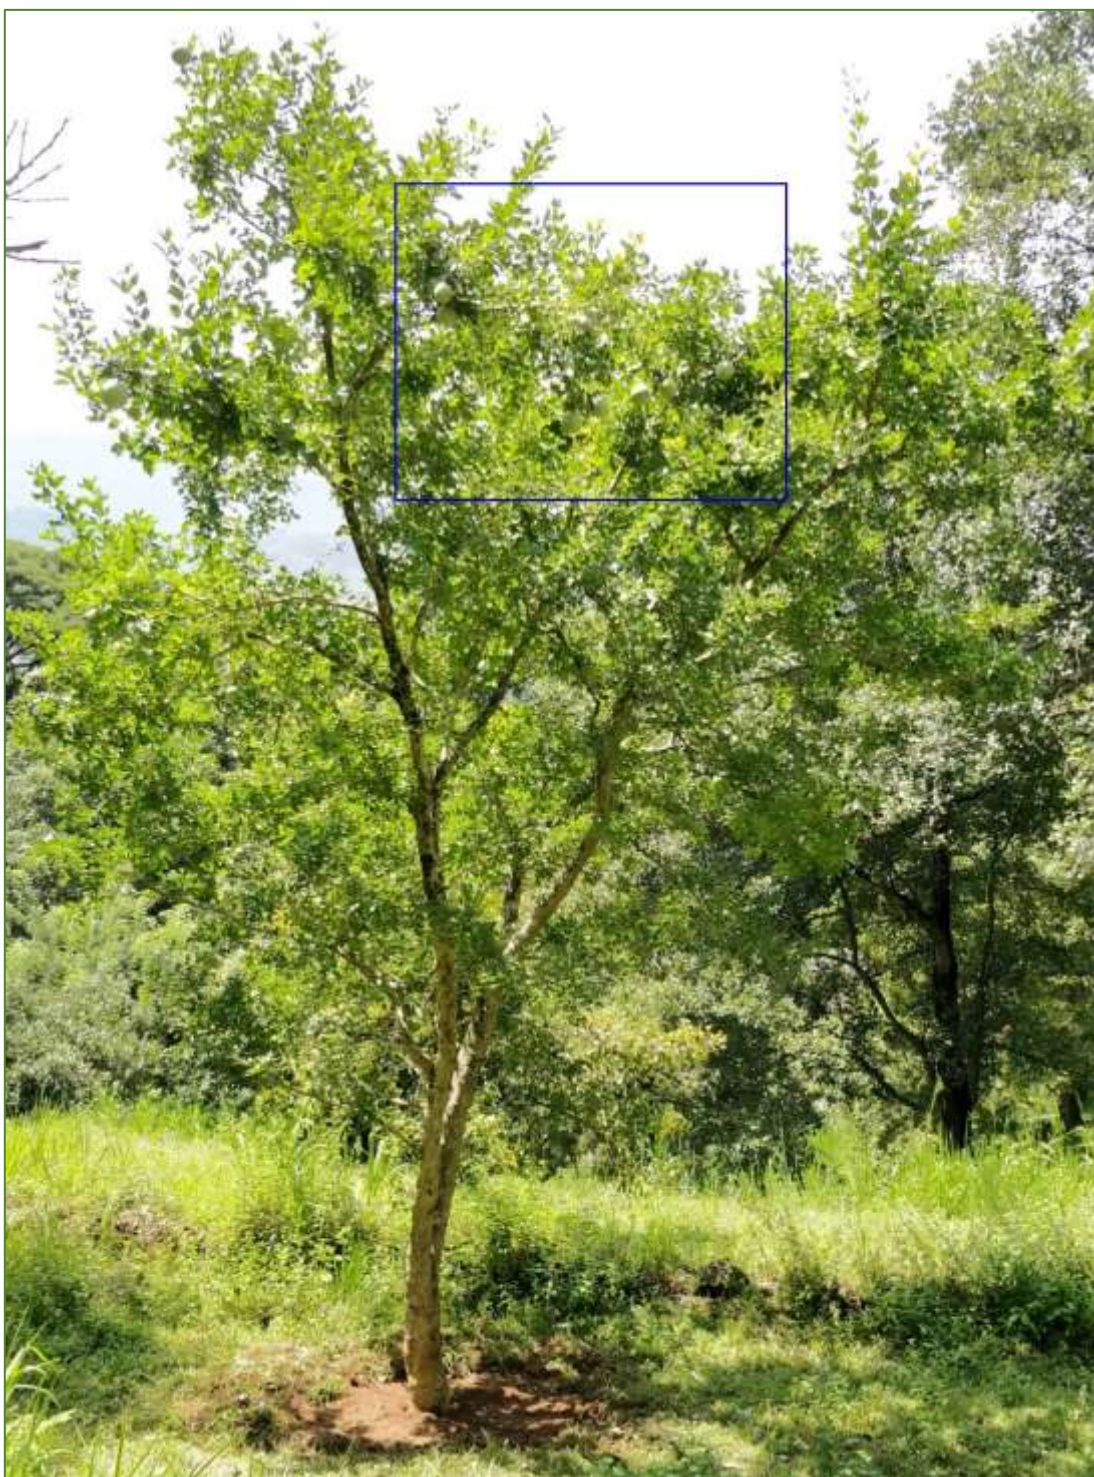

**S Figure 2.** A mature bael tree during the fruiting season.

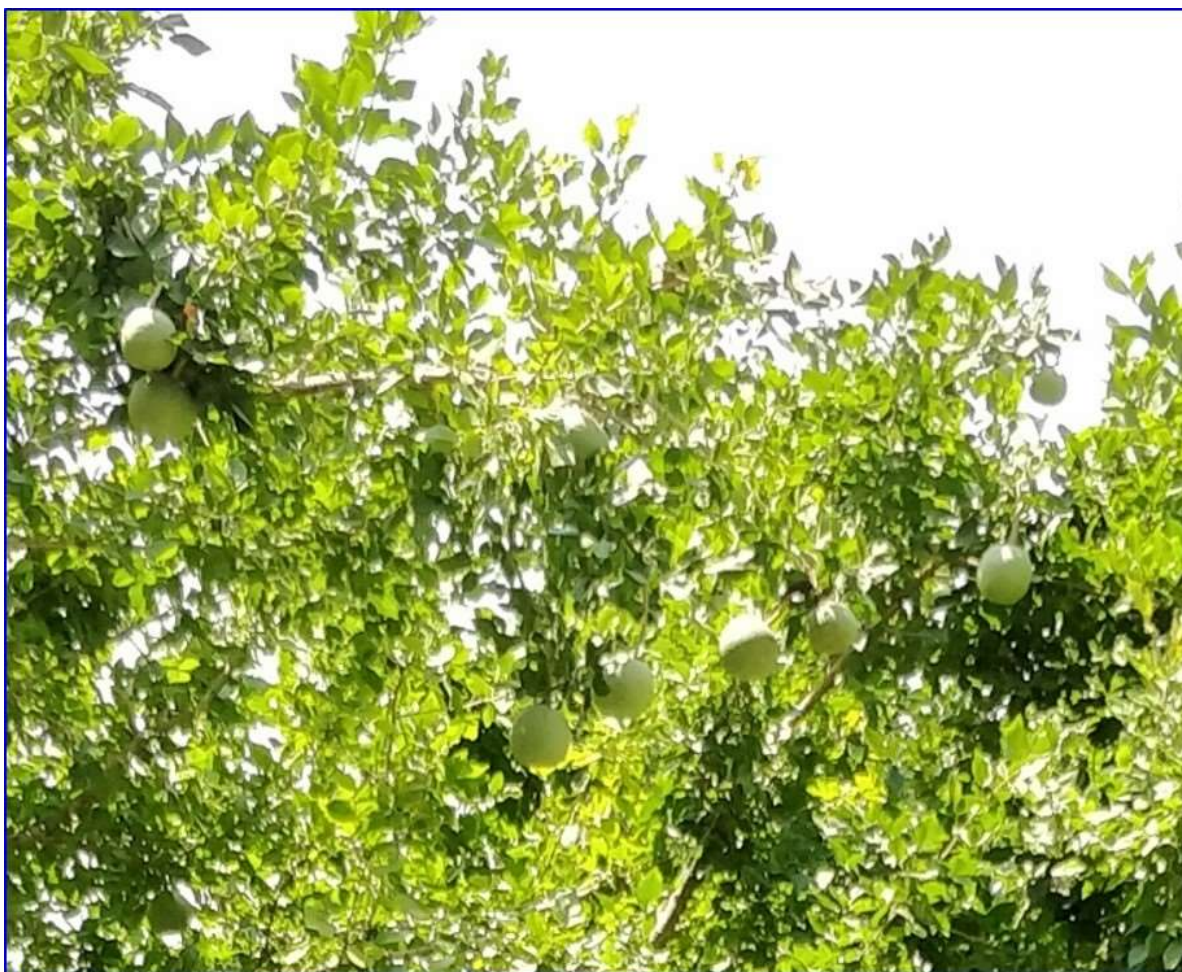

**S Figure 3.** A close-up view of the canopy section bearing fruits in the tree shown in S Figure 2.

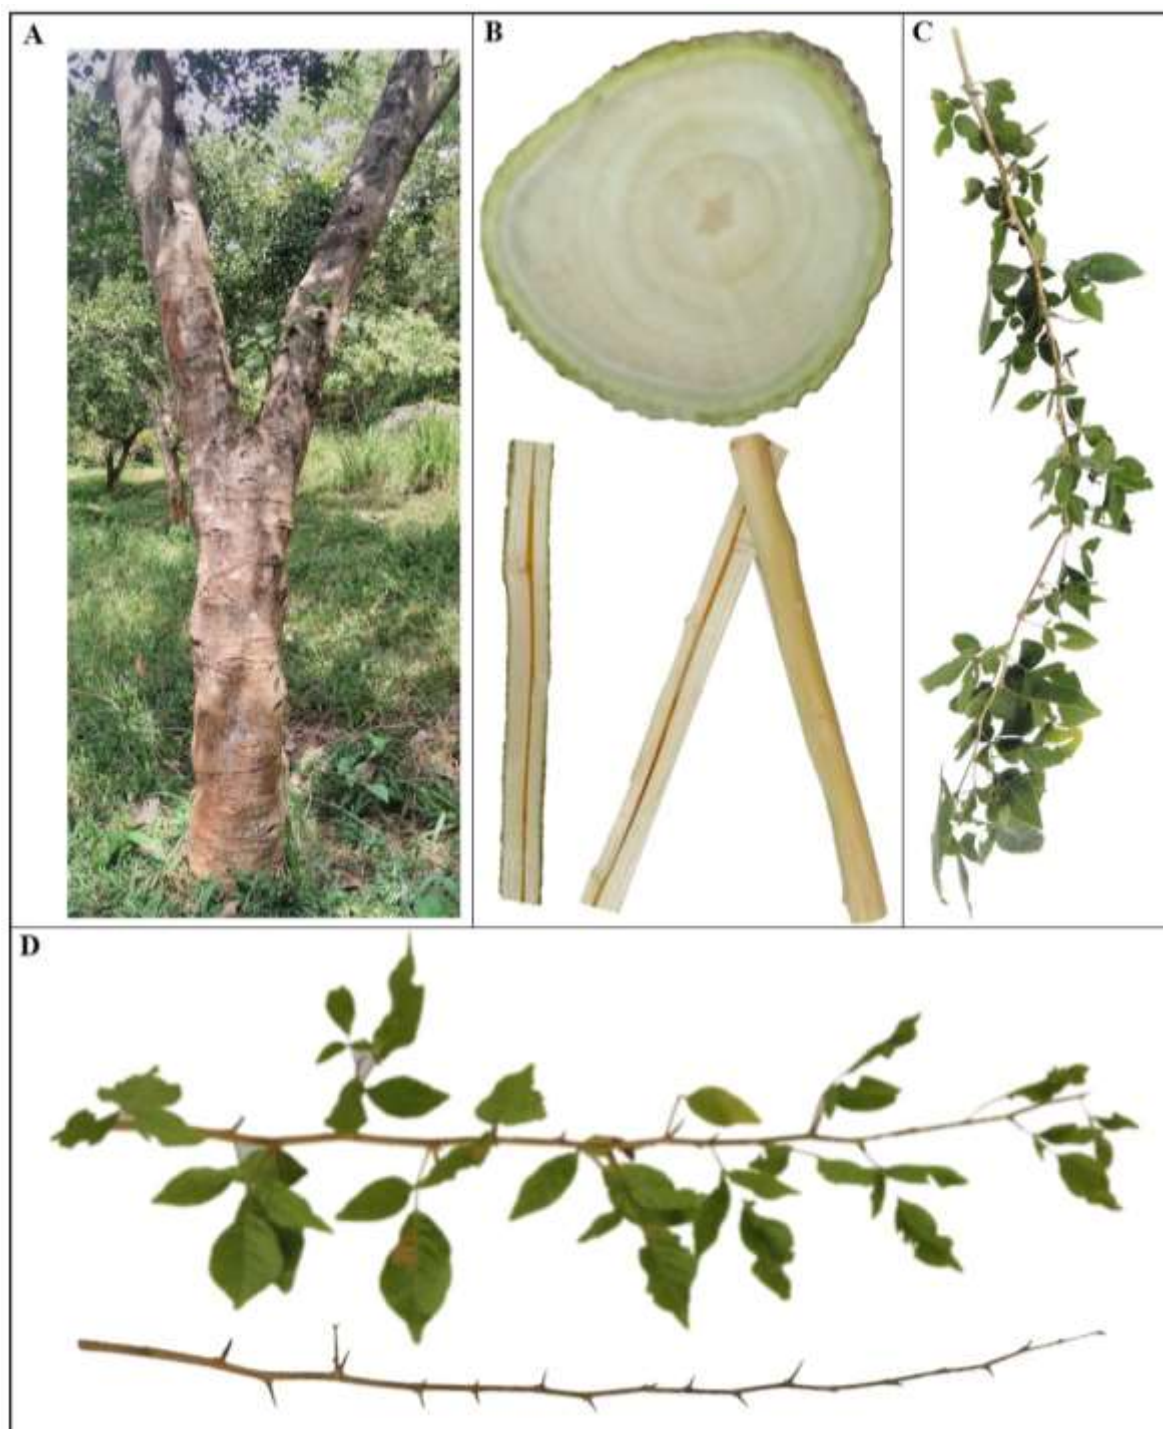

**S Figure 4.** Vegetative structures of bael. A: Stem or trunk; B: Cross and longitudinal sections of the stem; C: Thornless branch; D: Thorny branch with or without leaves. The images are not shown according to a scale.

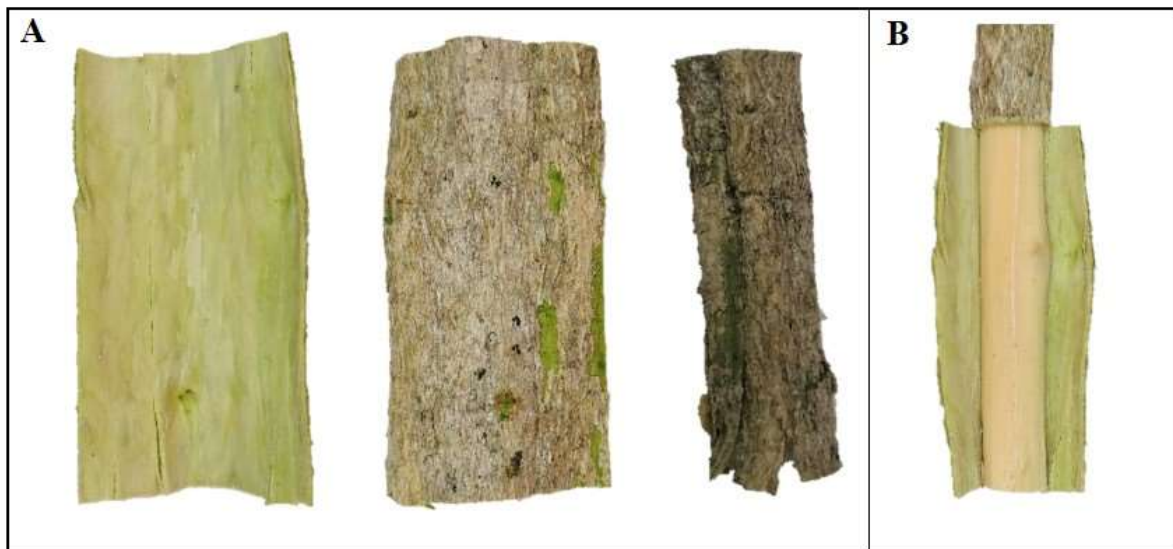

**S Figure 5.** The bark of bael stem. A: Internal, external, and dried external views of bark; B: Easy peeling of bark from the young stem.

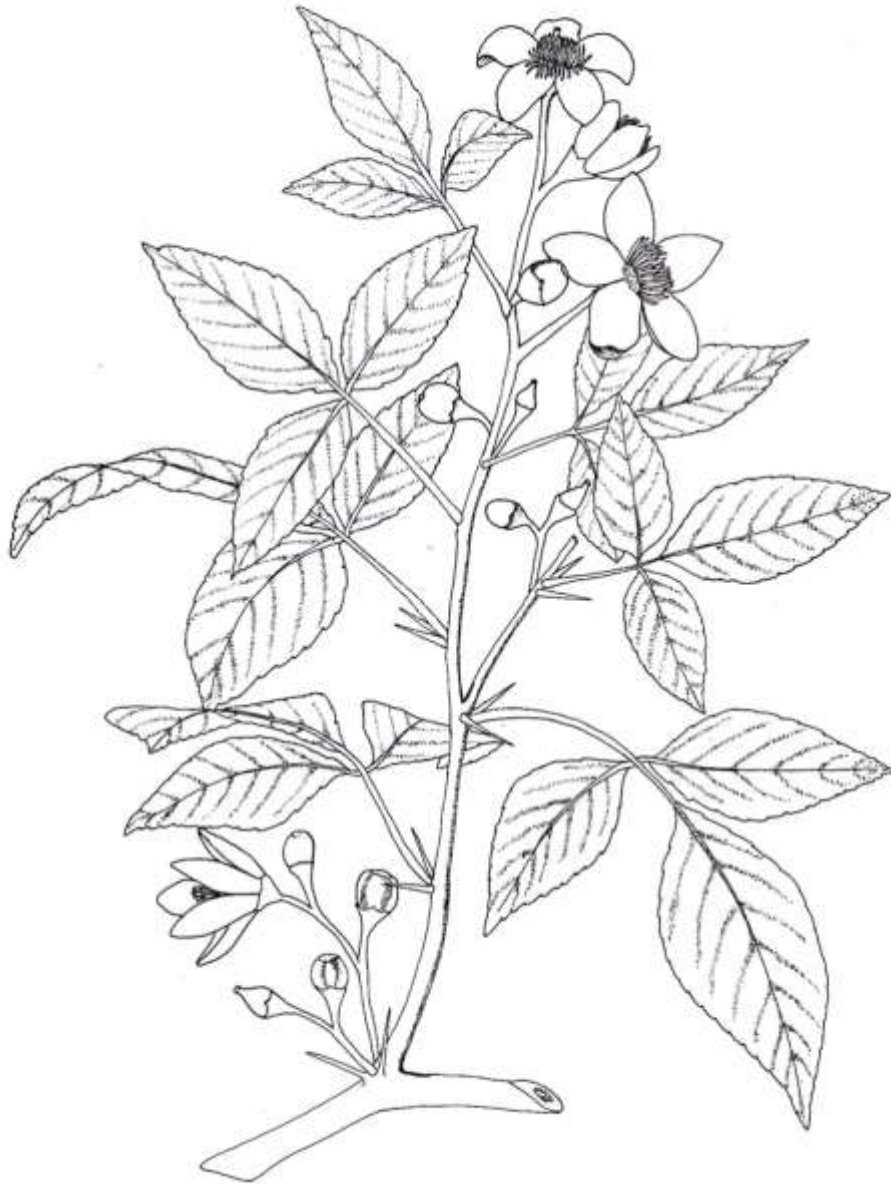

**S Figure 6.** Line diagram of a bael twig showing trifoliate leaves, thorns, flower buds, flowers and early fruits.

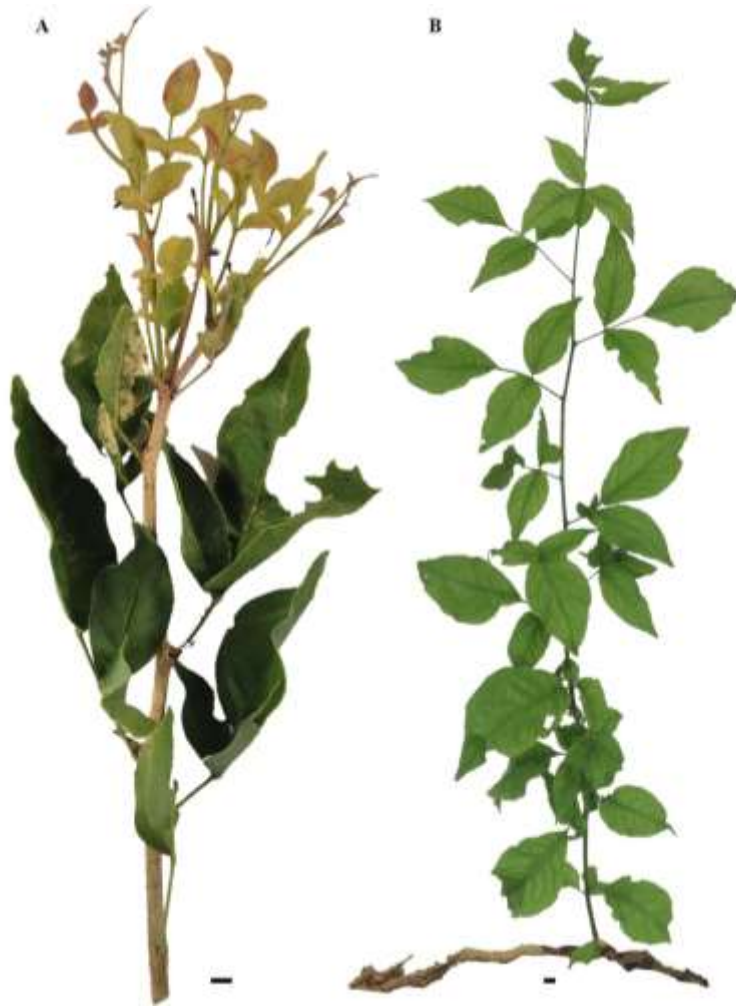

**S Figure 7.** Thornless twig with spurs (A) and a water sucker (B) at the stage of separation.

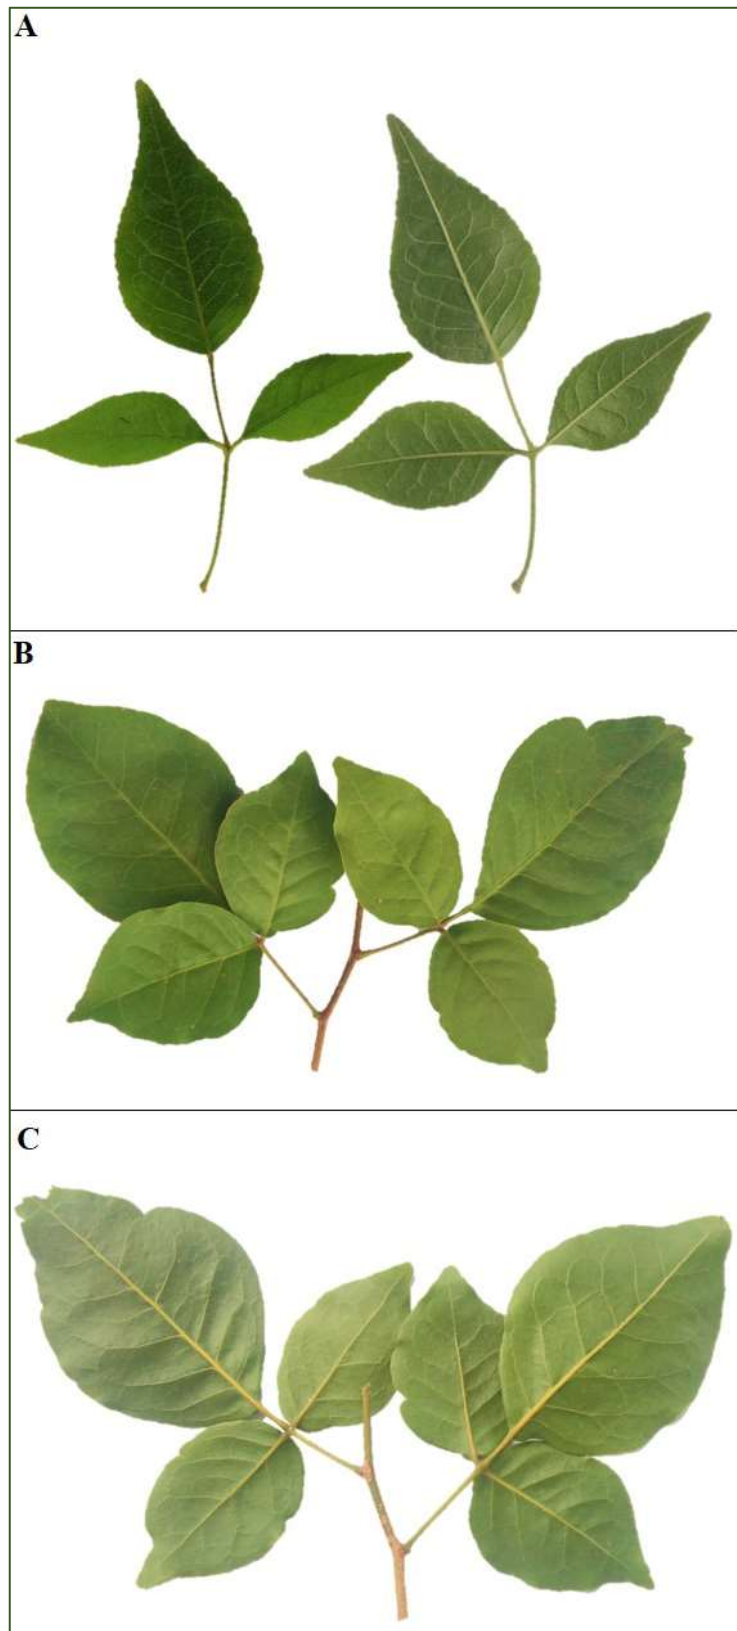

**S Figure 8.** Leaf morphology and emergence. A: Compound leaf – top and bottom views; B: Alternate leaf arrangement – top view; C: Alternate leaf arrangement – bottom view.

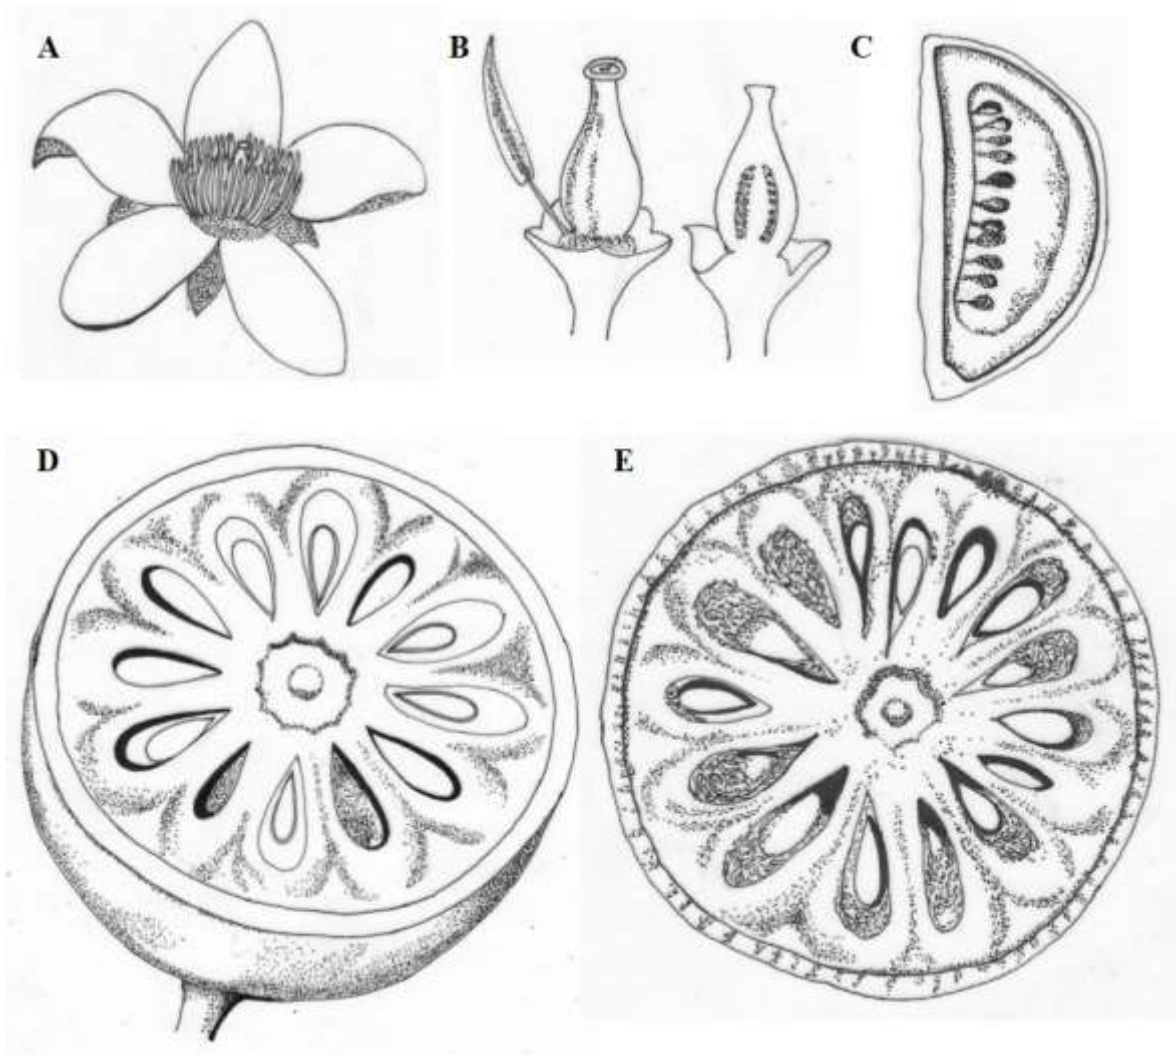

**S Figure 9.** Reproductive structures of bael. A: Flower; B: Gynoecium with a stamen (L) and L.S. of the gynoecium (R); C: T.S of the fruit; D: L.S. of the fruit showing a carpel; E: T.S of the fruit..

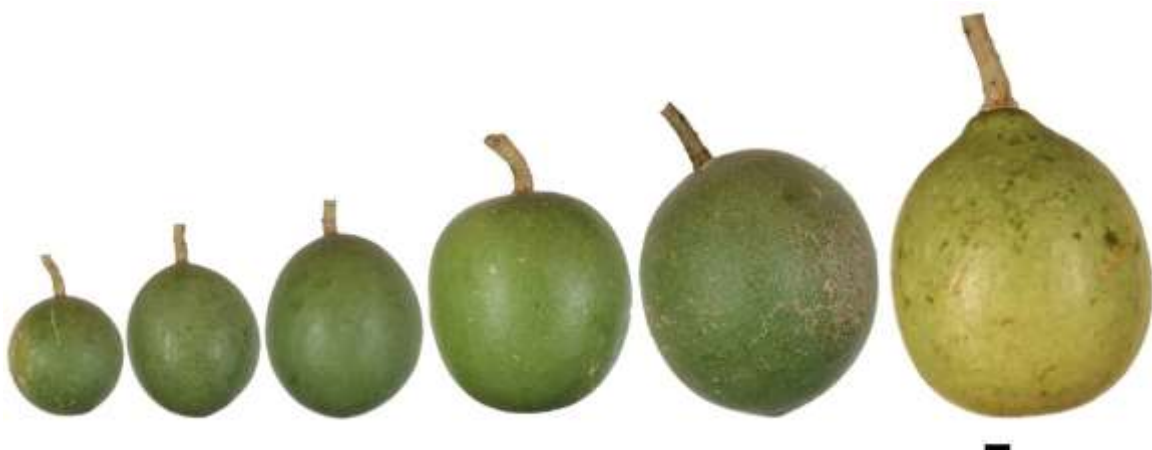

**S Figure 10.** Sequential development of fruits till ripening. Scale bar: 1 cm.

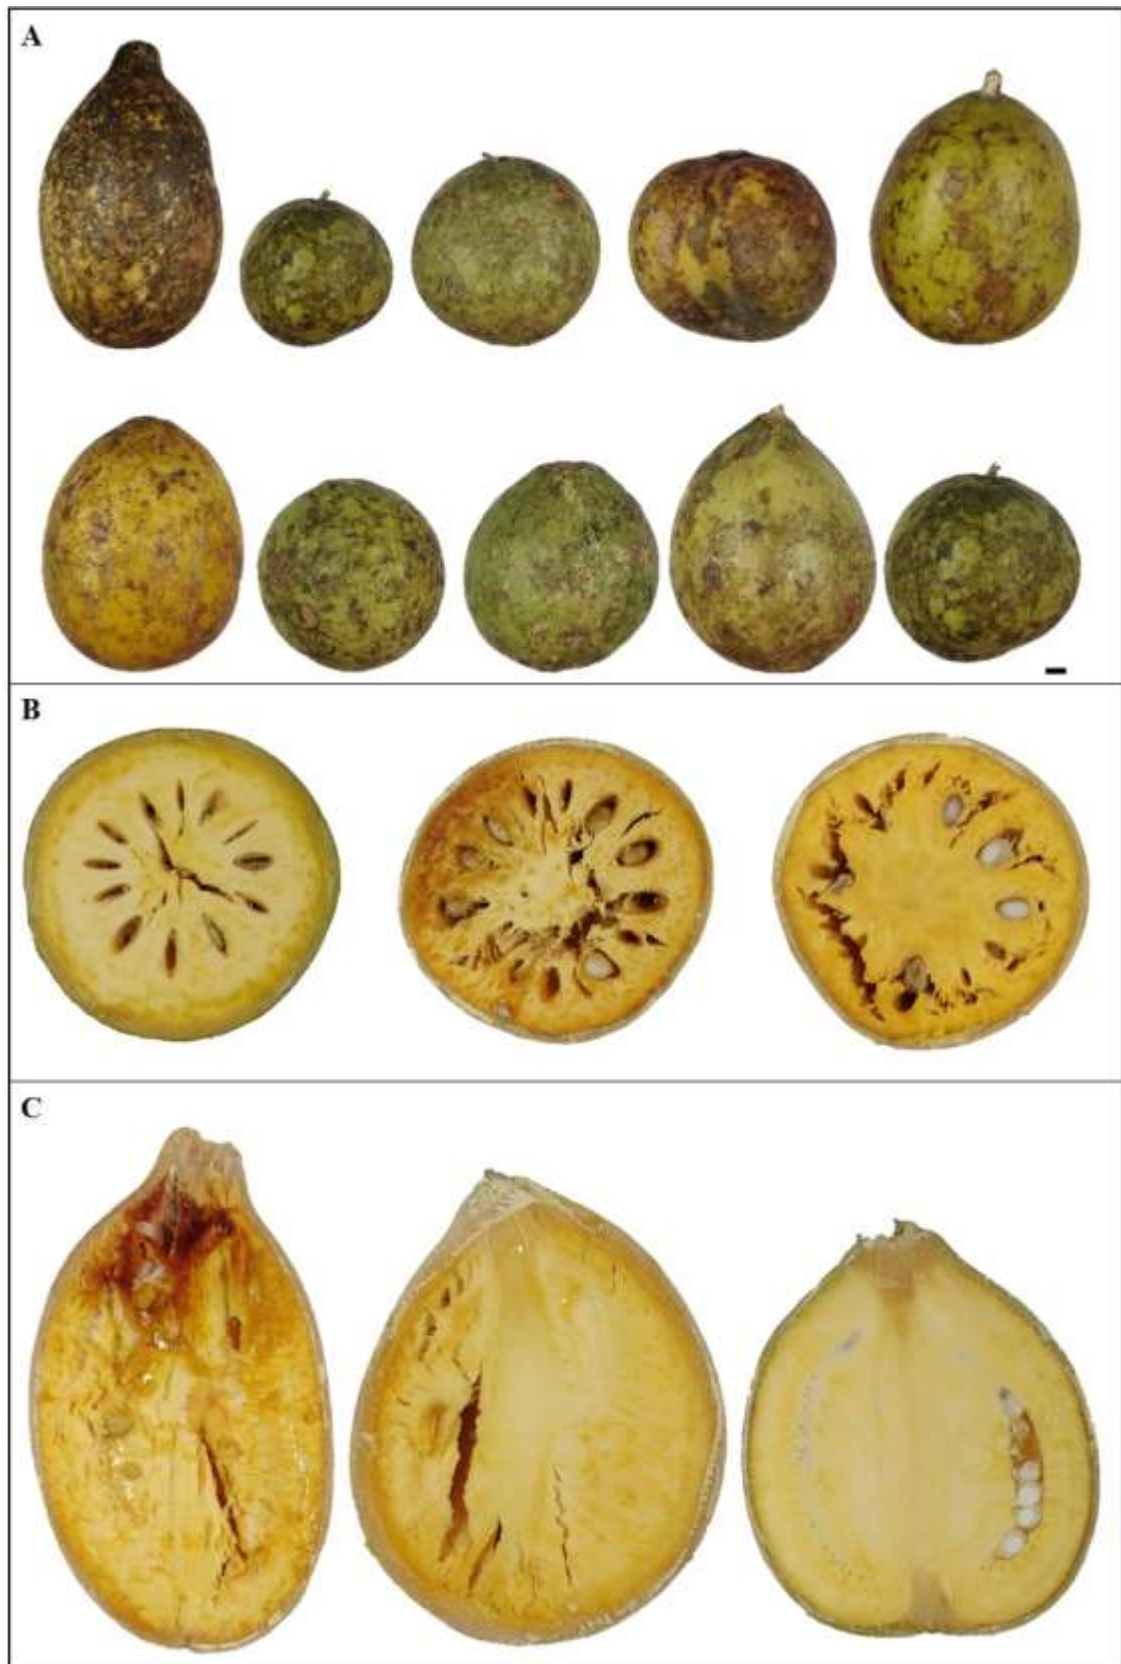

**S Figure 11.** Fruit Morphology. A: Shape and size variations: B: CS; C: LS.

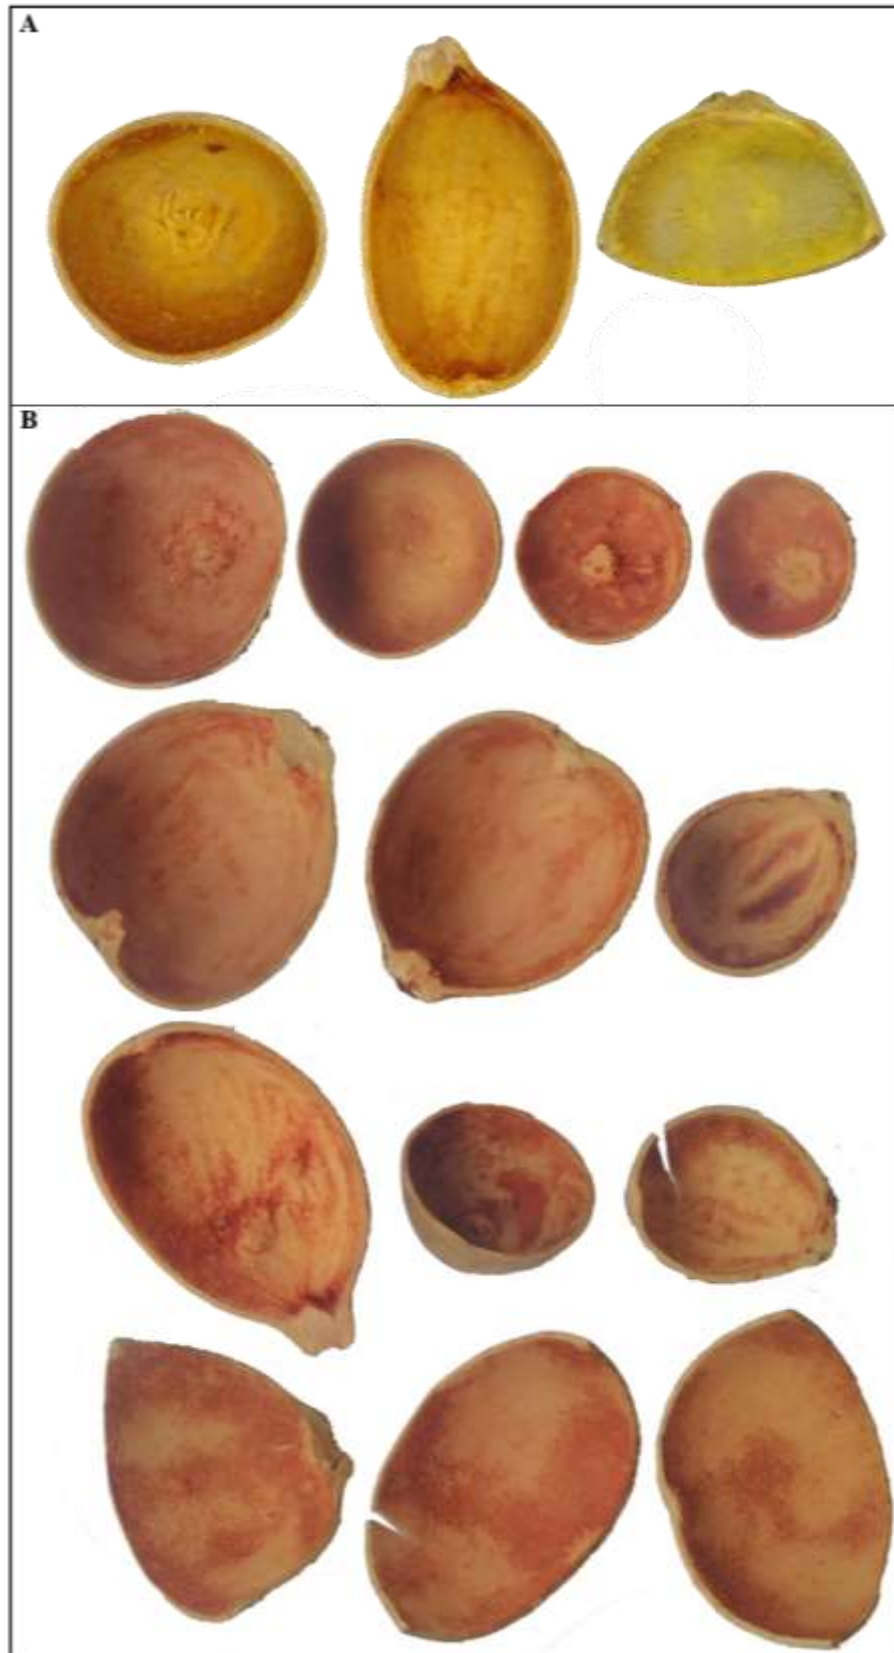

**S Figure 12.** Bael rinds. A: Immediately after scraping flesh from ripe fruits; B: Dried rinds.

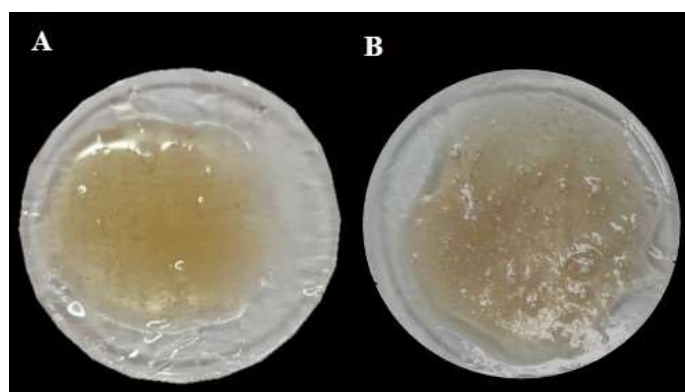

**S Figure 13.** Mucilage substance in bael fruits. A: immediately after collection; B: After four days of air-drying, mucilage became crystalized.

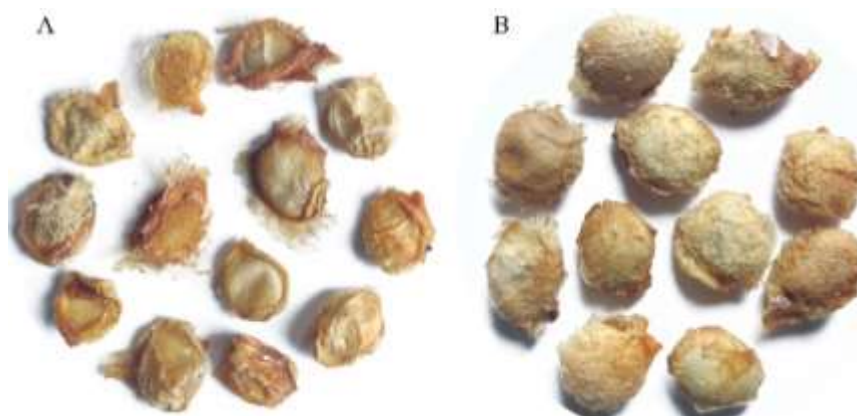

**S Figure 14.** Bael seeds. A: Empty (aborted seeds); B: Fully developed seeds.

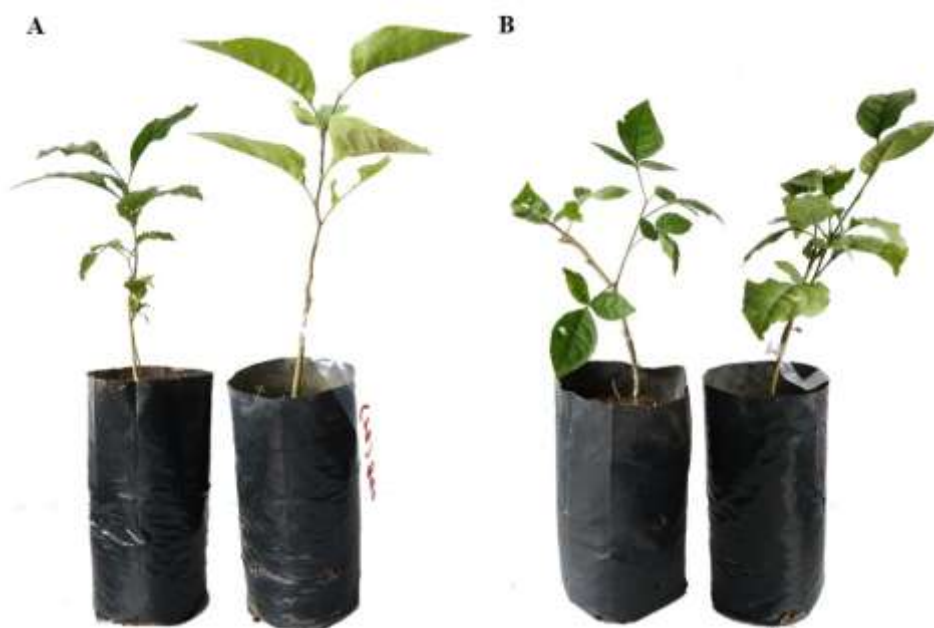

**S Figure 15.** Bael plant material for establishment. A: Seedlings; B: Budded plants.

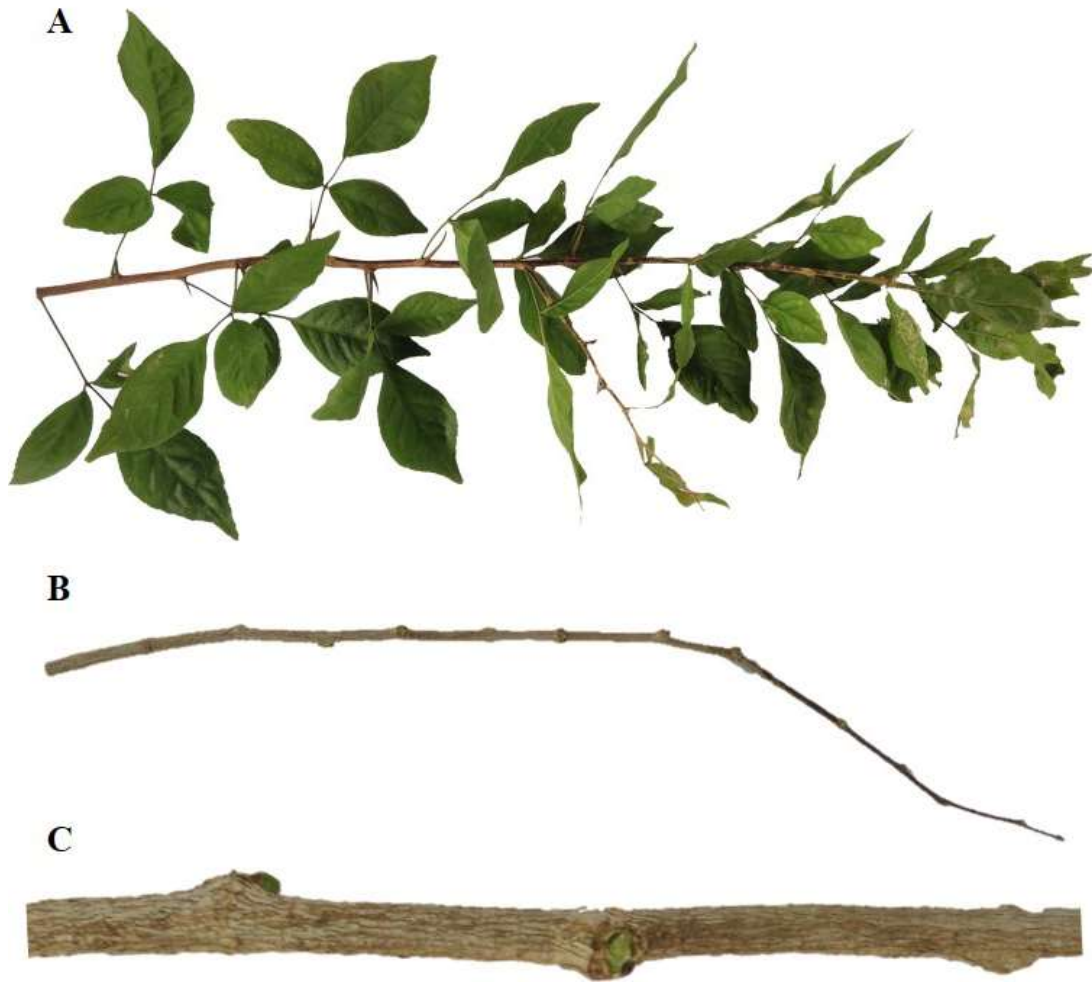

**S Figure 16.** Bud wood material. A: A branch harvested to obtain bud wood; B: Leaves removed; C: Closed up view of the bud wood.

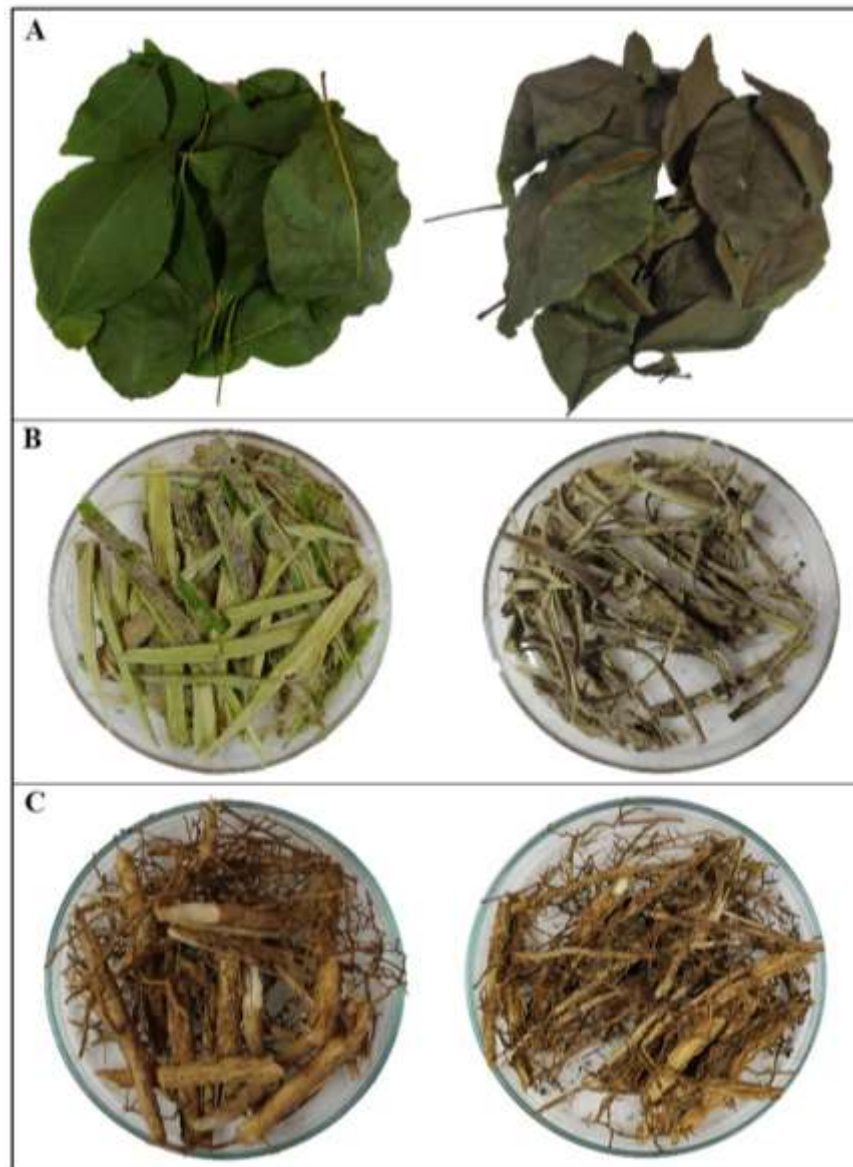

**S Figure 17.** Bud wood material. A: A branch harvested to obtain bud wood; B: Leaves removed; C: Closed up view of the bud wood.
